# Supplementary material
Source: PubMed Central journal article supplement (PMC2761429)
Supplement: NIHMS37230-supplement-01.pdf [file NIHMS37230-supplement-01.pdf]

**SUPPORTING INFORMATION FOR**  
**PROSTAGLANDIN E<sub>2</sub> INHIBITS TUMOR NECROSIS FACTOR-ALPHA RNA**  
**THROUGH PKA TYPE I**

**Jennifer B. Stafford and Lawrence J. Marnett**  
**From the Department of Biochemistry, Vanderbilt University School of Medicine,**  
**Nashville, Tennessee, 37232-0146**

Address correspondence to: Lawrence J. Marnett, Department of Biochemistry, Vanderbilt University School of Medicine, 23<sup>rd</sup> Avenue South at Pierce, Nashville, TN 37232, Tel: 615-343-7329; Fax: 615-343-7534; E-mail: [larry.marnett@vanderbilt.edu](mailto:larry.marnett@vanderbilt.edu).

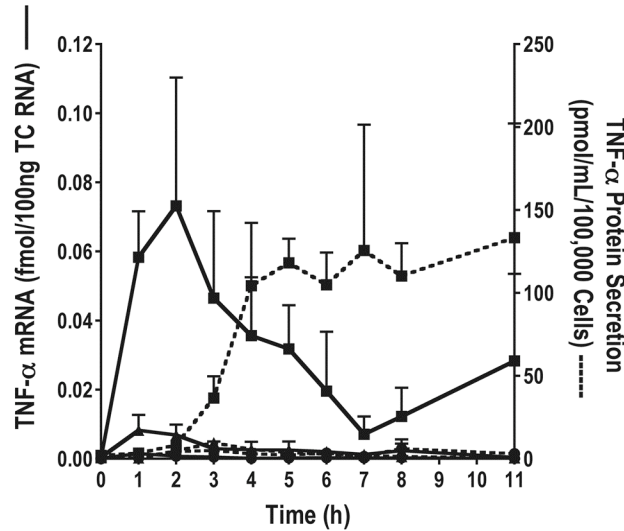

**Figure S1:** *PGE<sub>2</sub> and cPGI<sub>2</sub> inhibit TNF-α mRNA levels and biosynthesis.* A) Raw 264.7 macrophages were treated with 100 ng/mL LPS and 100 nM SC-560 and SC-236 in the presence of DMSO (vehicle, ■), 1 μM PGE<sub>2</sub> (▲) or 1 μM cPGI<sub>2</sub> (●). TNF-α mRNA (solid lines) was measured by Real-Time RT-PCR at 1 h intervals. TNF-α protein (dashed lines) in cell culture medium was measured by ELISA at 1 h intervals. B) Raw macrophages were treated with 1 μM Ionomycin in the presence of DMSO (■) or 1 μM PGE<sub>2</sub> (▲). TNF-α mRNA was measured by Real-Time RT-PCR at 1 h intervals. C) Raw macrophages were infected with 200 HA units/mL Sendai virus in the presence of DMSO (■) or 1 μM PGE<sub>2</sub> (▲). TNF-α mRNA was measured by Real-Time RT-PCR every 1 h.

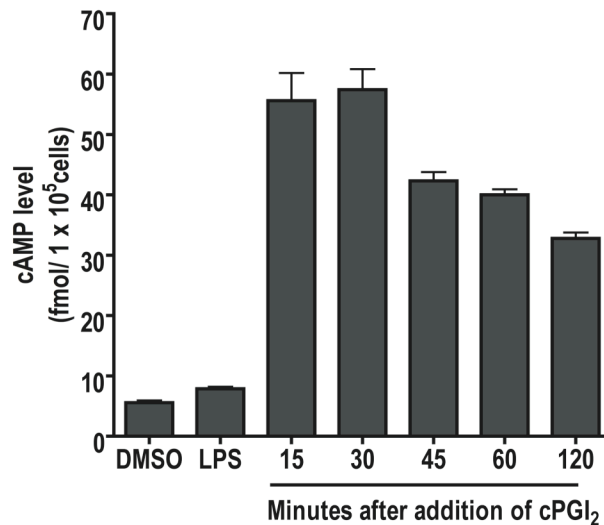

**Figure S2:** *cPGI<sub>2</sub> stimulates cAMP accumulation in Raw 264.7 macrophages.* Raw cells were treated with vehicle (DMSO) or 1 μg/mL LPS for 6 h. cPGI<sub>2</sub> was added to 6 h LPS pretreated cells and intracellular cAMP levels were measured by ELISA at intervals over the following 2 h.
